# Supplementary material
Source: PubMed Central journal article supplement (PMC3993266)
Supplement: AAC.01780-13_zac005142813so1.pdf [file AAC.01780-13_zac005142813so1.pdf]

1 **Supplementary Figure S1.**

2 **Nucleotide sequence of the genotype 6a neo subgenomic replicon**

3 The replicon sequence is based on the consensus nucleotide (nt) sequence of sixteen  
4 genotype 6a genomes (supplementary Table S1) available in the European HCV  
5 database. This replicon contains the following 12 elements: 1) GT6a 5'-UTR: 1-342 nt;  
6 2) GT6a the first 48 nucleotides of core: 343-390 nt; 3) an AscI linker: 391-399 nt; 4) the  
7 neomycin phosphotransferase II (neo) gene: 400-1194 nt; 5) an FseI linker: 1195-1212 nt;  
8 6) the encephalomyocarditis virus (EMCV) IRES: 1213-1815 nt; 7) GT6a NS3: 1816-  
9 3711 nt; 8) GT6a NS4A: 3712-3873 nt; 9) GT6a NS4B: 3874-4656 nt; 10) GT6a NS5A:  
10 4657-6009 nt; 11) GT6a NS5B: 6010-7782 nt; and 12) GT2a JFH-1 3'-UTR: 7783-8021.

11 GCCAGCCCCCTTAACGGGGCGACACTCCGCCATTATCACTCCCCTGTGAGGAACTACTGTCTTC  
12 ACGCAGAAAGCGTCTAGCCATGGCGTTAGTATGAGTGTCGTACAGCCTCCAGGCCCCCCCCCTC  
13 CCGGGAGAGCCATAGTGGTCTGCGGAACCGGTGAGTACACCGGAATTGCCAGGATGACCGGG  
14 TCCTTTCCATTGGATCAAACCCGCTCAATGCCTGGAGATTTGGGCGTGCCCCGCAAGACTGC  
15 TAGCCGAGTAGCGTTGGGTTGCGAAAGGCCTTGTGGTACTGCCTGATAGGGTGCTTGCAGAGTG  
16 CCCCAGGAGGTCTCGTAGACCGTGCATCATGAGCACACTTCCAAAACCCCAAAGAAAAACCA  
17 AAAGAAACACCAACGGCGCGCCAATGATTGAACAAGATGGATTGCACGCAGGTTCTCCGGCC  
18 GCTTGGGTGGAGAGGCTATTCGGCTATGACTGGGCACAACAGACAATCGGCTGCTCTGATGCC  
19 GCCGTGTTCCGGCTGTCAGCGCAGGGGCGCCGGTCTTTTTGTCAAGACCGACCTGTCCGGT  
20 GCCCTGAATGAACTGCAGGACGAGGCAGCGCGGCTATCGTGGCTGGCCACGACGGGCGTTCC  
21 TTGCGCAGCTGTGCTCGACGTTGTCACTGAAGCGGGAAGGGACTGGCTGCTATTGGGCGAAGT  
22 GCCGGGGCAGGATCTCCTGTCATCTCACCTTGCTCCTGCCGAGAAAGTATCCATCATGGCTGA  
23 TGCAATGCGGCGGCTGCATACGCTTGATCCGGCTACCTGCCATTCGACCACCAAGCGAAACA  
24 TCGCATCGAGCGAGCACGTA CTGGATGGAAGCCGGTCTTGTCGATCAGGATGATCTGGACG  
25 AAGAGCATCAGGGGCTCGCGCCAGCCGAACTGTTCCGCCAGGCTCAAGGCGCGCATGCCCGAC

26 GCGAGGATCTCGTCGTGACCCATGGCGATGCCTGCTTGCCGAATATCATGGTGGAAAATGGC  
27 CGCTTTTCTGGATTCATCGACTGTGGCCGGCTGGGTGTGGCGGACCGCTATCAGGACATAGCG  
28 TTGGCTACCCGTGATATTGCTGAAGAGCTTGGCGGCGAATGGGCTGACCGCTTCTCGTGCTT  
29 TACGGTATCGCCGCTCCCGATTTCGACGCGCATCGCCTTCTATCGCCTTCTTGACGAGTTCTTCT  
30 GAGGCCGGCCGCGGCCGCAACAGACCACAACGGTTTCCCTCTAGCGGGATCAATTCCGCCCCC  
31 CCCCCCTAACGTTACTGGCCGAAGCCGCTTGAATAAGGCCGGTGTGCGTTTGTCTATATGTT  
32 ATTTTCCACCATATTGCCGTCTTTTGGCAATGTGAGGGCCCGGAAACCTGGCCCTGTCTTCTTG  
33 ACGAGCATTCTAGGGGTCTTCCCTCTCGCCAAAGGAATGCAAGGTCTGTTGAATGTCGTG  
34 AAGGAAGCAGTTCCTCTGGAAGCTTCTTGAAGACAAACAACGTCTGTAGCGACCCTTGCAGG  
35 CAGCGGAACCCCCACCTGGCGACAGGTGCCTCTGCGGCCAAAAGCCACGTGTATAAGATAC  
36 ACCTGCAAAGGCGGCACAACCCAGTGCCACGTTGTGAGTTGGATAGTTGTGGAAAGAGTCA  
37 AATGGCTCTCCTCAAGCGTATTCAACAAGGGGCTGAAGGATGCCAGAAGGTACCCCATTTGTA  
38 TGGGATCTGATCTGGGGCCTCGGTGCACATGCTTTACATGTGTTTAGTCGAGGTTAAAAAAC  
39 GTCTAGGCCCCCCGAACCACGGGGACGTGGTTTTCCCTTTGAAAAACACGATACGCGTATGGCT  
40 CCCATCACCGCGTATGCGCAGCAGACGAGGGGCTAGTCGGCACCATTGTGACCAGCCTAAC  
41 CGGGCGTGACAAAAATGAGGTCGAAGGGGAGGTACAGGTGGTCTCCACGGCTACCCAATCCT  
42 TCCTGGCGACCTCCATTAATGGTGTGTCATGTGGACTGTTTATCATGGGGCCGGTTCAAAGACTCT  
43 CGCTGGACCGAAAGGACCAGTGTGTCAAATGTACACCAATGTGGACAAGGACCTAGTAGGAT  
44 GGCCATCTCCCCGGGAGCAAGGTCGCTACCCCATGTACTTGTGGCTCTAGTGACCTCTATCT  
45 GGTCACGAGGGAGGCCGACGTTATCCCCGCAAGGCGCAGGGGTGACAACCGTGCTGCCCTCC  
46 TCTCTCCTAGGCCATAAGCACCTTGAAAGGCTCCTCGGGAGGCCCCATTATGTGTCCCTCGG  
47 GGCACGTTGTGGGACTCTTCCGAGCTGCCGTATGCACAAGGGGTGTAGCAAAATCCTTAGATT  
48 TTATCCCAGTGGAAAACATGGAGACGACTATGCGCTCTCCCTCATTACAGACAACCTCCACGC  
49 CGCCTGCGGTGCCCCAGACCTATCAGGTAGGGTATCTGCACGCACCAACAGGCAGCGGAAAG  
50 AGCACCCGTGTTCCGGCGGCGTACGCTAGCCAGGGCTACAAGGTGTTGGTCTTGAACCCATCG  
51 GTGGCGGCAACGCTTAGCTTTGGCTCTTATATGAGGCAAGCTTACGGCGTGGAGCCGAATGTC  
52 CGGACCGGGGTCAGGACTGTAACCACAGGGGGCGCTATCACGTA CTCCACATATGGGAAATT  
53 CTTGGCCGATGGGGGATGTTCCGGAGGAGCGTACGACATCATCATCTGTGATGAGTGCCACTC

54 CACAGACCCTACGACGGTGTGGGCATTGGCACGGTTCTCGACCAGGCTGAGACTGCCGGGGT  
55 TCGCCTTACTGTGCTCGCAACAGCAACGCCGCCGGGTTCTGTCACTGTCCCCATCCTAACATA  
56 ACAGAGACAGCCCTCCCGACTACGGGAGAAATACCATTTTATGGAAAGGCCATCCCCCTGA  
57 GTACATCAAAGGGGGAAGACATCTCATATTCTGTCACTCAAAGAAGAAGTGCGATGAGCTGG  
58 CCGGGAAACTGAAATCACTCGGCTTAAACGCCGTGCGATTCTACAGAGGTGTCGATGTGTCCG  
59 TCATCCCCACCTCGGGCGATGTCGTGCTGCGCAACAGACGCCCTTATGACCGGCTACACAG  
60 GCGATTTTCGATTCCGTCATCGACTGTAACGTAGCCGTGACACAGGTGGTGGATTTAGCTTGG  
61 ACCCAACATTTTCCATAGAGACTACCACCGTCCCTCAGGATGCGGTATCACGGAGCCAACGAC  
62 GAGGCCGCACGGGGCGGGGTAAACCGGGGGTGTACAGATTTGTCTCCCAAGGGGAGAGGCCT  
63 TCGGGTATGTTTCGACACCGTCGTCCTGTGTGAGGCTTATGACACGGGATGCGCGTGGTACGAA  
64 CTAACCCCTTCTGAAACAACCTGTCAGGTTGAGGGCCTATATGAACACTCCTGGCCTTCCCGTA  
65 TGCCAAGACCACCTGGAATTTTGGGAAGGCGTGTTTACTGGCTTGACTCACATAGACGCCAC  
66 TTTCTGTCTCAGACGAAGCAGGGGGTGAAGACTTCGCGTACCTCGTGGCATAACCAGGCTACA  
67 GTGTGCGCCAGGGCCAAAGCCCCCGCCTTCTTGGGATACGATGTGGAAGTGTCTCATCAGA  
68 CTCAAACCCACCCTTACCGGCCCACTCCACTTTTGTATCGGCTGGGGGCCGTCCAAAATGAG  
69 ATAATAACAACCCATCCAATAACCAAATACATCATGACCTGTATGTCTGCGGATTTGGAGGTT  
70 ATCACCAGCACATGGGTCCTCGTGGGTGGAGTCCTAGCCGCGCTCGCAGCCTACTGCTTGTC  
71 GTGGGCTGTGTTGTCATCTGTGGCAGGATAACTTTGACTGGCAAGCCTGCTGTTGTCCCTGATC  
72 GCGAGATCTTATACCAGCAATTTGACGAGATGGAGGAGTGCTCTAGGCACATCCCCTACCTCG  
73 CTGAGGGCCAGCAGATCGCCGAACAGTTCAGACAAAAGGTGTTGGGACTCCTCCAAGCGAGC  
74 GCTAAGCAGGCAGAAGAAGCTGAAGCCTGCTGTCCATTCCGCGTGGCCTAGGGTGGAGGAGTT  
75 TTGGAGGAAACACATGTGGAACCTTGTGTCAGCGGGATTTCAGTACTTGGCGGGCTTATCCACTCT  
76 GCCCGGCAACCCAGCCGTGGCATCATTGATGTCATTTACAGCGTCGCTGACCAGTCCTCTGAG  
77 GACTTCTCAGACCCTGCTCCTCAACATACTCGGCGGCTGGATAGCCACCCAAGTGGCTCCCC  
78 CCCC GCGTCTACAGCTTTTGTGCTGAGCGGTCTAGCAGGAGCCACGGTTGGAAGCATCGGGCT  
79 CGGGAGGGTGTGGTTGATGTGCTCGCCGATACGGAGCCGGTGTGTCGGGTGCTCTAGTCGC  
80 TTTCAAGATCATGAGCGGCGAGTGCCCGACCACGGAAGACATGGTCAATCTGCTACCCGCGCT  
81 GTTGTGCGCCAGGGGCTCTCGTGGTGGGGTTCGTGTGTGCTGCCATCTTAAGACGCCACGTTGG

82 CCCTGCTGAGGGTGCTAACCAGTGGATGAACAGGCTAATAGCCTTTGCATCAAGAGGCAACC  
83 ACGTGTCCCCGACGCACTACGTGCCTGAGACTGACGCATCAAAAAATGTGACTCAGATACTCA  
84 CTTCTCTTACCATCACCAGCCTACTCCGTAGATTACATCAGTGGGTCAATGAAGACACGGCCA  
85 CCCCTTGCGCTACCTCATGGTTACGCGACGTGTGGGACTGGGTGTGTACAGTGTTATCTGATTT  
86 TAAAGTATGGCTGCAAGCCAAACTTCTCCCTCGCCTGCCGGGGATCCCCTTCCTCTCGTGCCA  
87 AACGGGATATAGGGGAGTCTGGGCAGGGGACGGGGTGTGCCACACCACTTGTACCTGTGGGG  
88 CCGTGATAGCTGGACACGTCAAAAATGGCACCATGAAAATCACAGGGCCCAAGACATGCAGT  
89 AACACTTGGCACGGGACTTTTCCAATCAACGCCACCACTACCGGCCCCAGCACACCACGACCA  
90 GCCCCAACTATCAGCGCGCTCTTTGGCGGGTATCTGCCGAGGACTACGTTGAGGTACGGAGG  
91 TTGGGCGACTGCCACTATGTGGTAGGGGTCACTGCTGAAGGGTTGAAGTGCCCTTGCCAGGTG  
92 CCTGCGCCTGAATTCTTCACTGAGGTGATGGCGTGAGGATACACCGTTACGCGCCACCTTGC  
93 AAGCCCTTGCTCAGGGACGAAGTGACTTTCTCTGTGGGTCTTTCAAATATGCCATAGGGTCG  
94 CAGCTCCCTTGCGAGCCAGAGCCTGACGTGACCGTAGTCACCTCAATGCTCACAGACCCACG  
95 CACATCACCGCAGAGACGGCAGCACGGCGGTTGAAGAGGGGGTCCCCCCCCTCCTTAGCCAG  
96 CTCTTCGGCCATCCAGCTGTCTGCACCGTCCCTCAAGGCTACTTGCACAACCTTCCAAAGACCA  
97 CCCGGACATGGAACCTCATCGAGGCCAACCTCCTTTGGAGGCAGGAGATGGGAGGCAACATCA  
98 CTCGAGTCGAGTCAGAGAACAAAGTTGTAGTACTTGACTCCTTTGAGCCTCTAACCGCTGAGT  
99 ATGACGAGAGGGAAATCTCAGTATCAGCTGAGTGCCATAGGCCACCCAGGCACAAATTCCT  
100 CCAGCTCTCCAATATGGGCCAGGCCTGACTACAATCCACCTCTCCTACAAGCATGGCAAATG  
101 CCCGGATACGAGCCTCCAGTCGTGTCTGGGTGTGCCGTGCCCCACCTAAACCGGCACCAATT  
102 CCCCCGCCGAGGCGGAAGAGGCTAGTGCACTTGGATGAGTCCACGGTCTCGCACGCCTTGGC  
103 GCAGCTCGCCGACAAGGTATTTGTGGAGAGTAGTAGTGACCCAGGACCTAGTTCAGACTCGG  
104 GACTATCAATAACCAGTCCCGTTCCACCTGCCCAACAACACCGGACGACGCCTGCTCAGAAG  
105 CAGAGTCCTATAGCTCAATGCCCCCTTTGAGGGGGAGCCTGGTGACCCTGACCTAAGCTCAG  
106 GCTCTTGGTCCACTGTGAGCGATCAGGACGACGTCGTGTGTTGTTCCATGTCCTATTCCTGGAC  
107 GGGGGCTCTAATAACACCATGTGCTGCGGAGGAGGAGAAGCTTCCAATAAATCCCCTGAGCA  
108 ACTCCCTCATAAGACACCATAACATGGTGTATTCCACCACATCACGCAGCGCCAGCCTCCGCC  
109 AGAAGAAGGTACATTTGACAGAGTGCAAGTGTTGACCAACATTATCAGGATGTACTAAAG

110 GAGATTAAGCTTCGAGCGTCCACGGTGCAGGCGAAGCTCCTATCCATAGAGGAAGCCTGCGA  
111 CCTCACACCATCGCACTCAGCCCGGTCCAAATATGGGTATGGTGCACAGGACGTTAGAAGCCA  
112 TGCTAGCAAGGCCGTTGACCACATCCGCTCCGTGTGGGAGGACTTGCTAGAAGACTCTGATAC  
113 CCCAATTCCCACGACCATCATGGCTAAGAATGAAGTCTTCTGCGTAGATCCGTCGAAGGGTGG  
114 ACGCAAGCCGGCACGCCTAATAGTTTACCCAGACTTGGGCGTGCGGGTCTGCGAGAAGATGG  
115 CCCTATACGACGTGACGCGGAAGTTACCACAGGCCGTGATGGGTTTACGCATACGGATTCCAGT  
116 ACTCCCCTAACCAGAGGGTTGAGTACTTGCTCAAAATGTGGCGGTCAAAGAAGGTGCCCATG  
117 GGCTTTTCTTACGACACCAGGTGTTTTGATTCAACCGTCACCGAGCGGGATATCCGGACTGAG  
118 AACGACATCTATCAGTCTTGCCAGCTGGATCCCGTGGCAAGGAAGGCAGTATCATCCCTAACA  
119 GAACGGCTCTACGTAGGCGGCCCCATGGTAAACTCCAAGGGACAGTCATGTGGCTACCGTAG  
120 ATGCCGCGCCAGTGGGGTGCTGCCACGAGCATGGGAAACACCCTCACATGCTATCTGAAGG  
121 CACAGGCCCGCTGCAGGGCGGCCAACATCAAGGACTGTGACATGTTGGTGTGCGGAGATGAC  
122 TTAGTGGTCATTTGTGAGAGTGCTGGCGTCCAGGAGGACACTGCGTCACTGCGAGCATTACG  
123 GATGCTATGACCAGGTACTCAGCTCCCCCTGGAGACGCCCCGCAACCTACGTATGACCTTGAG  
124 CTCATAACATCGTGCTCATCCAATGTCTCCGTCGCCCACGACGGCAATGGGAAGAGATATTAC  
125 TACCTCACACGTGACTGTACCACTCCACTTGCGCGGGCCGCTGGGAGACAGCCCGCCACACT  
126 CCAGTCAATTCGTGGTTGGGCAACATCATTATGTTTGGCCCCACGATATGGGTGCGTATGGTTC  
127 TGATGACCCATTTTTTCTCCATCCTCCAGTCGCAAGAACAATTGGAGAAAGCACTCGACTTTG  
128 ACATCTACGGAGTGACCTATTCCGTCTCTCACTTGATCTCCAGCAATCATTCAACGACTCCA  
129 TGGCATGGCAGCATTTTCACTCCACGGATACTCTCCAGTTGAGCTCAATAGGGTAGGGGCTTG  
130 CCTCAGGAAACTTGGGGTACCTCCCTTGCGAGCCTGGAGACATCGAGCCAGAGCTGTCAGAG  
131 CCAAACCTCATTGCCCAAGGGGGGAAAGCGGCTATATGCGGTAAGTACCTCTTCAACTGGGCG  
132 GTGAAGACCAAACATAAACTCACTCCATTGGTCTCCGCGAGCAAGCTTGACTTATCAGGCTGG  
133 TTCGTGGCAGGCTACGACGGGGGGGACATTTATCACAGCGTGTCCAGGCTCGACCCCGTCTC  
134 TTA CTCTTGGCCTACTCCTACTCACCGTAGGGGTAGGCATCTTTTTGCTCCCCGCTCGGTAGA  
135 GCGGCACACACTAGGTACACTCCATAGCTAACTGTTCTTTTTTTTTTTTTTTTTTTTTTTTTTT  
136 TTTTTTTTTTTTTTTCTTTTTTTTTTTTTTCCCTCTTCTCCCTTCTCATCTTATTCTACTTTCTTT

137 CTTGGTGGCTCCATCTTAGCCCTAGTCACGGCTAGCTGTGAAAGGTCCGTGAGCCGCATGACT

138 GCAGAGAGTGCCGTAACGGTCTCTCTGCAGATCATGT

139

140

141

142

143

144

145

146

147

148

149

150

151

152

153

154

155

156

157

158 **Supplementary Table S1.**

159 **The list of sixteen genotype 6a genomes in the European HCV database**

160 **used to generate consensus for the genotype 6a subgenomic replicon**

| Accession # | Virus Isolate | Sequence Length | Note                                |
|-------------|---------------|-----------------|-------------------------------------|
| AY859526    | 6a33          | 9355            | Complete coding sequence; no 3'-UTR |
| DQ480512    | 6a77          | 9358            | Complete coding sequence; no 3'-UTR |
| DQ480513    | 6a35          | 9358            | Complete coding sequence; no 3'-UTR |
| DQ480514    | 6a63          | 9358            | Complete coding sequence; no 3'-UTR |
| DQ480515    | 6a64          | 9358            | Complete coding sequence; no 3'-UTR |
| DQ480516    | 6a61          | 9358            | Complete coding sequence; no 3'-UTR |
| DQ480517    | 6a73          | 9358            | Complete coding sequence; no 3'-UTR |
| DQ480518    | 6a65          | 9358            | Complete coding sequence; no 3'-UTR |
| DQ480519    | 6a66          | 9358            | Complete coding sequence; no 3'-UTR |
| DQ480520    | 6a67          | 9358            | Complete coding sequence; no 3'-UTR |
| DQ480521    | 6a69          | 9358            | Complete coding sequence; no 3'-UTR |
| DQ480522    | 6a72          | 9358            | Complete coding sequence; no 3'-UTR |
| DQ480523    | 6a62          | 9358            | Complete coding sequence; no 3'-UTR |
| DQ480524    | 6a74          | 9361            | Complete coding sequence; no 3'-UTR |
| EU246930    | D9            | 9376            | Complete coding sequence; no 3'-UTR |
| Y12083      | EUHK2         | 9340            | Complete coding sequence; no 3'-UTR |

161 The consensus sequence shown in supplementary Figure S1 was generated using Vector

162 NTi software (Invitrogen)

163

164

165

166

167 **Supplementary Table S2.**

168 **Mutations identified in stable GT6a replicon colonies**

| <b>Cells</b> | <b>Replicon Clone#</b> | <b>NS3</b>            | <b>NS4A</b> | <b>NS5A</b>  | <b>NS5B</b> |
|--------------|------------------------|-----------------------|-------------|--------------|-------------|
| <b>1C</b>    | <b>1</b>               | <b>K272R</b>          |             |              |             |
|              | <b>2</b>               |                       | <b>K34R</b> |              |             |
|              | <b>3</b>               | <b>K272R</b>          |             |              |             |
|              | <b>4</b>               | <b>D405Y</b>          |             | <b>L361P</b> |             |
|              | <b>5</b>               | <b>K272R</b>          |             |              |             |
|              | <b>6</b>               | <b>E30V(E)</b>        |             |              |             |
|              | <b>7</b>               | <b>P89L</b>           |             |              |             |
|              | <b>8</b>               | <b>K272R</b>          |             |              |             |
|              | <b>9</b>               | <b>E110V</b>          |             |              |             |
|              | <b>10</b>              | <b>Q195P</b>          |             |              |             |
|              | <b>11</b>              | <b>K272R</b>          |             |              |             |
| <b>Lunet</b> | <b>1</b>               | <b>T580A/T621A(T)</b> |             |              |             |
|              | <b>2</b>               |                       |             |              | <b>I11V</b> |
|              | <b>3</b>               | <b>T621A</b>          |             |              |             |
|              | <b>4</b>               | <b>T261P</b>          |             |              |             |
|              | <b>5</b>               | <b>T312P</b>          |             |              |             |
|              | <b>6</b>               |                       | <b>E52V</b> |              |             |
|              | <b>7</b>               |                       | <b>K34R</b> |              |             |
|              | <b>8</b>               | <b>T76I</b>           |             |              |             |
|              | <b>9</b>               |                       | <b>K34R</b> |              |             |
|              | <b>10</b>              | <b>E30V(E)</b>        |             |              |             |
|              | <b>11</b>              |                       | <b>L31V</b> |              |             |
|              | <b>12</b>              | <b>K272R</b>          |             |              |             |

169 The selected GT6a replicon clones were expanded and subjected to genotypic analysis.

170 Only amino acid changes were indicated in the table.
